# Supplementary material for: Human cerebral organoids establish subcortical projections in the mouse brain after transplantation
Source: PubMed Central journal article supplement (PMC8505255; doi:10.1038/s41380-020-00910-4), 2020-10-13
Supplement: 41380_2020_910_MOESM1_ESM.pdf [file 41380_2020_910_MOESM1_ESM.pdf]

Supplementary Materials for

**Human cerebral organoids establish subcortical  
projections in the mouse brain after transplantation**

Xin Dong<sup>1,2#</sup>, Shi-Bo Xu<sup>1#</sup>, Xin Chen<sup>3#</sup>, Meng-Dan Tao<sup>1</sup>, Xiao-Yan Tang<sup>1</sup>, Kai-Heng Fang<sup>1</sup>, Min Xu<sup>1</sup>, Yufeng Pan<sup>4</sup>, Yuejun Chen<sup>5</sup>, Shuijin He<sup>3\*</sup>, and Yan Liu<sup>1,6\*</sup>

\*Correspondence: [yanliu@njmu.edu.cn](mailto:yanliu@njmu.edu.cn) or [heshj@shanghaitech.edu.cn](mailto:heshj@shanghaitech.edu.cn)

# These authors contributed equally to this work

**This PDF file includes:**

Supplementary Fig. 1-5

Supplementary Table 1-3

References

## Supplementary Table 1

Overview of different transplantation trials based on stem cell therapy.

| <b>hPSC-derived material</b>                         | <b>Depth of transplantation</b>      | <b>Projection area</b>                                                                   | <b>Distance of the projections</b> | <b>Electrophysiological activity</b>                                                                             | <b>Functional integration</b>                                                                                                          | <b>Behavioral improvement</b>              | <b>Ref</b> |
|------------------------------------------------------|--------------------------------------|------------------------------------------------------------------------------------------|------------------------------------|------------------------------------------------------------------------------------------------------------------|----------------------------------------------------------------------------------------------------------------------------------------|--------------------------------------------|------------|
| Cerebral organoids                                   | Retrosplenial cortex (DV: -0.2~1 mm) | Ventrally and rostrally innervated more in the ipsilateral hemisphere                    | Almost 4 mm (at 90 dpi)            | Yes, multielectrode array results suggested functional maturation at the late stage                              | Yes, optogenetic stimulation revealed functional output connectivity from the organoid graft to the host brain.                        | No significant change                      | 1          |
| Single cortical neurons                              | Somatosensory cortex (DV: -0.5 mm)   | Ipsilateral motor cortex, striatum, thalamus, contralateral SCx1 and the corpus callosum | In the centimeter range (at 5 MPT) | Yes, grafted neurons were excitable, fired action potentials and received both excitatory and inhibitory inputs. | Yes, electron microscopy and ex vivo whole-cell recording suggested structural integration and functional network connectivity.        | None                                       | 2          |
| Dissociated neural progenitor cells and organoids    | 1 mm below the dura                  | None                                                                                     | None                               | None                                                                                                             | None                                                                                                                                   | None                                       | 3          |
| Small cerebral organoids vs dissociated neural cells | mPFC (DV: -2.6 mm)                   | From mPFC to LH and to more ventral and caudal brain areas                               | More than 4.5 mm (at 1 month)      | Yes, engrafted organoids differentiated into functionally mature neurons                                         | Yes, whole-cell recordings with channelrhodopsin 2 stimulation revealed an integrated network and functional postsynaptic integration. | Yes, fear memory acquisition was increased | This study |

## Supplementary Table 2: Antibodies used in this study.

| Antibody               | Isotype       | Dilution | Source (cat.no)                |
|------------------------|---------------|----------|--------------------------------|
| BRN2                   | Mouse<br>IgG  | 1:500    | Santa Cruz (sc-393324)         |
| CTIP2                  | Rat<br>IgG    | 1:400    | Abcam (ab1845)                 |
| DCX                    | Rabbit<br>IgG | 1:300    | Cell Signal Technology (4604)  |
| FOXP2                  | Rabbit<br>IgG | 1:1000   | Abcam (AB16046)                |
| FOXP1                  | Rabbit<br>IgG | 1:1000   | Abcam (AB18259)                |
| GFAP                   | Rabbit<br>IgG | 1:2000   | Dako (Z0334)                   |
| GFP                    | Rabbit<br>IgG | 1:1000   | Chemicon (AB3080)              |
| Glutamate              | Rabbit<br>IgG | 1:5000   | Sigma-Aldrich (G6642)          |
| Human Nuclei           | Mouse<br>IgG  | 1:1000   | Chemicon (MAB1281)             |
| HOPX                   | Rabbit<br>IgG | 1:500    | Sigma-Aldrich (HPA030180)      |
| Human<br>Synaptophysin | Human<br>IgG  | 1:500    | eBioscience (147-6525-80)      |
| Ki67                   | Rabbit<br>IgG | 1:500    | ZYMED (180191Z)                |
| MAP2                   | Mouse<br>IgG  | 1:1000   | Sigma-Aldrich (M1406)          |
| NANOG                  | Goat<br>IgG   | 1:1000   | R&D (AF1997)                   |
| NeuN                   | Mouse<br>IgG  | 1:2000   | Arigo (ARG53383)               |
| NESTIN                 | Goat<br>IgG   | 1:1000   | Santa Cruz (sc-21247)          |
| NCAM                   | Mouse<br>IgG  | 1:1000   | Santa Cruz (SC-106)            |
| PAX6                   | Rabbit<br>IgG | 1:1000   | Covance (PRB-278P)             |
| PDGFra                 | Rabbit<br>IgG | 1:500    | Cell Signal Technology (3174s) |
| PKC- $\lambda$         | Mouse<br>IgG  | 1:1000   | BD (610207)                    |

|                      |               |        |                          |
|----------------------|---------------|--------|--------------------------|
| VGLUT1               | Mouse<br>IgG  | 1:1000 | Sysy (135311)            |
| SATB2                | Mouse<br>IgG  | 1:1000 | Abcam (AB51502)          |
| Sox2                 | Goat<br>IgG   | 1:300  | R&D (AF2018)             |
| TBR1                 | Rabbit<br>IgG | 1:1000 | Abcam (AB31940)          |
| STEM121              | Mouse<br>IgG  | 1:1000 | Stem Cell (AB-121-U-050) |
| $\beta$ -III Tubulin | Mouse<br>IgG  | 1:2000 | Sigma-Aldrich (T8660)    |
| $\beta$ -III Tubulin | Rabbit<br>IgG | 1:2000 | Covance (PRB-435P)       |

---

| <b>Antibody</b>        | <b>Dilution</b> | <b>Source (cat.no)</b>            |
|------------------------|-----------------|-----------------------------------|
| 488 Donkey Anti-Goat   | 1:2000          | Thermo Fisher Scientific (A11055) |
| 488 Donkey Anti-Mouse  | 1:2000          | Thermo Fisher Scientific (A21202) |
| 488 Donkey Anti-Rabbit | 1:2000          | Thermo Fisher Scientific (A21206) |
| 546 Donkey Anti-Goat   | 1:2000          | Thermo Fisher Scientific (A11056) |
| 546 Donkey Anti-Mouse  | 1:2000          | Thermo Fisher Scientific (A10036) |
| 546 Donkey Anti-Rabbit | 1:2000          | Thermo Fisher Scientific (A10040) |

---

### Supplementary Table 3.

Summary table showing the number of immunodeficient mice used for immunostaining, behavioral, electrophysiological and retrograde tracing experiments.

| Figure number                                 | Group   | Transplantation time | Brain sections | Number of mice |
|-----------------------------------------------|---------|----------------------|----------------|----------------|
| Fig. 2b and 2c,<br>Supplementary<br>Fig. 3a-f | N/A     | > one month          | Sagittal       | n=5            |
| Fig. 2d and 2e                                | N/A     | 2~3 months           | Sagittal       | n=8            |
| Fig. 3b                                       | N/A     | 3 months             | Coronal        | n=3            |
| Fig. 3d                                       | N/A     | ~5 months            | Coronal        | n=5            |
| Fig. 4                                        | N/A     | ~5 months            | Coronal        | n=3            |
| Fig. 5a-e                                     | N/A     | 2~4 months           | Sagittal       | n=8            |
| Fig. 5g                                       | N/A     | >4 months            | Sagittal       | n=6            |
| Fig. 6b-d                                     | Control | >1.5 months          | N/A            | n=11           |
|                                               | Trans   | >1.5 months          | N/A            | n=12           |
| Fig. 6e                                       | Control | >1.5 months          | N/A            | n=9            |
|                                               | Trans   | >1.5 months          | N/A            | n=13           |
| Supplementary<br>Fig. 3h-k                    | N/A     | 1~2 months           | Coronal        | n=3            |
| Supplementary<br>Fig. 4                       | N/A     | 2~3 months           | Sagittal       | n=5            |
| Supplementary<br>Fig. 5a                      | Control | 8 weeks              | N/A            | n=9            |
|                                               | DISS    | 8 weeks              | N/A            | n=9            |
|                                               | SMAL    | 8 weeks              | N/A            | n=14           |
| Supplementary<br>Fig. 5 b-c                   | N/A     | 1~2 months           | Sagittal       | n=8            |

## References

1. Mansour AA, Goncalves JT, Bloyd CW, Li H, Fernandes S, Quang D *et al.* An in vivo model of functional and vascularized human brain organoids. *Nat Biotechnol* 2018; **36**(5): 432-441.
2. Real R, Peter M, Trabalza A, Khan S, Smith MA, Dopp J *et al.* In vivo modeling of human neuron dynamics and Down syndrome. *Science* 2018; **362**(6416).
3. Daviaud N, Friedel RH, Zou H. Vascularization and Engraftment of Transplanted Human Cerebral Organoids in Mouse Cortex. *eNeuro* 2018; **5**(6).
