# Supplementary material for: Human cerebral organoids establish subcortical projections in the mouse brain after transplantation
Source: PubMed Central journal article supplement (PMC8505255; doi:10.1038/s41380-020-00910-4), 2020-10-13

# Supplementary Fig. 3

a **HO/hN/NANOG**

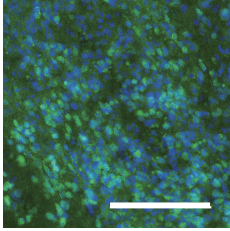

b **HO/hN/KI67**

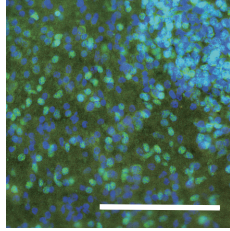

c **GFP/VGLUT1**

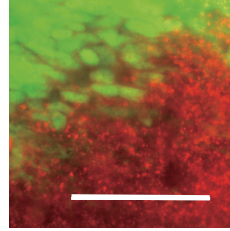

d **HO/GFP/GFAP**

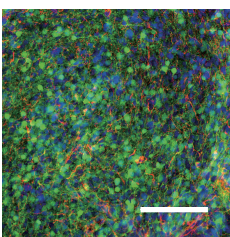

e **PDGFRα/hN**

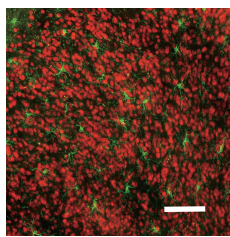

f **MBP/STEM121**

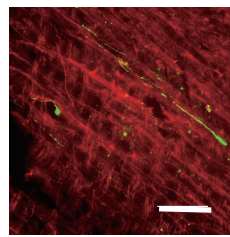

g

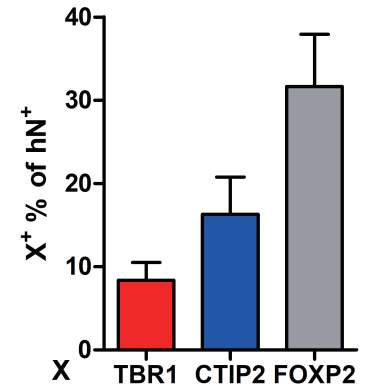

h

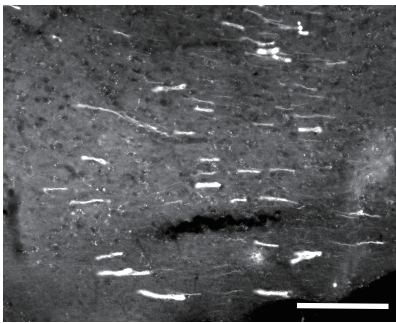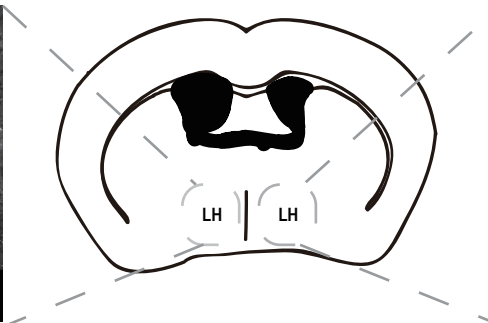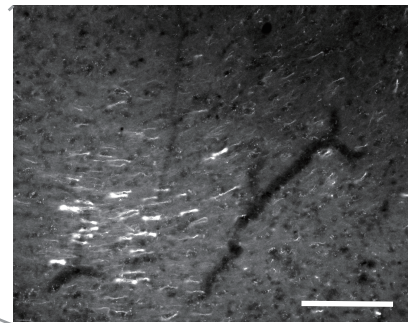

i **MCH/hSYN**

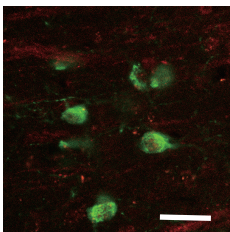

j **VGLUT1/hSYN**

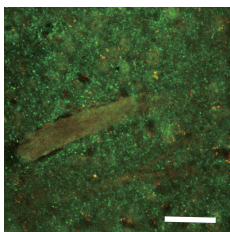

k **GABA/hSYN**

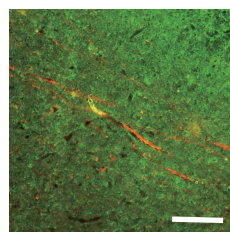

Supplement: 41380_2020_910_MOESM4_ESM.pdf [file 41380_2020_910_MOESM4_ESM.pdf]
