# Supplementary material for: Human cerebral organoids establish subcortical projections in the mouse brain after transplantation
Source: PubMed Central journal article supplement (PMC8505255; doi:10.1038/s41380-020-00910-4), 2020-10-13

# Supplementary Fig. 4

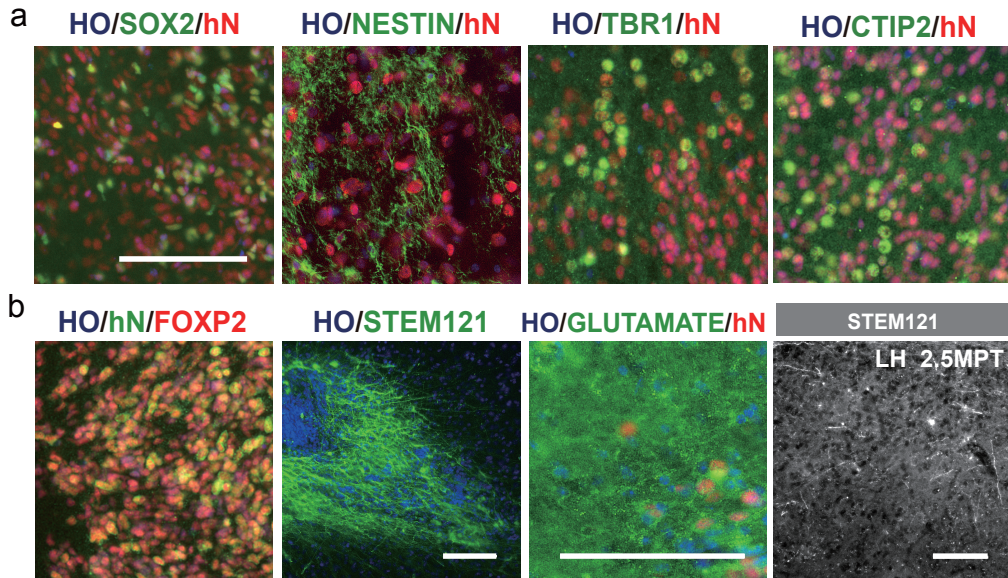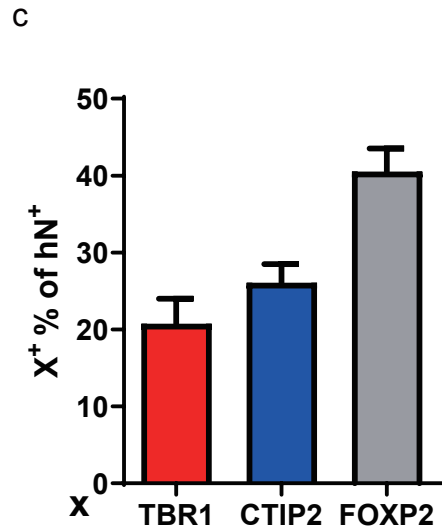

Supplement: 41380_2020_910_MOESM5_ESM.pdf [file 41380_2020_910_MOESM5_ESM.pdf]
